# Supplementary material for: Broad-spectrum kinome profiling identifies CDK6 upregulation as a driver of lenvatinib resistance in hepatocellular carcinoma
Source: PubMed Central journal article supplement (PMC10593849; doi:10.1038/s41467-023-42360-w), 2023-10-23
Supplement: 41467_2023_42360_MOESM2_ESM.pdf [file 41467_2023_42360_MOESM2_ESM.pdf]

## Reporting Summary

Nature Portfolio wishes to improve the reproducibility of the work that we publish. This form provides structure for consistency and transparency in reporting. For further information on Nature Portfolio policies, see our [Editorial Policies](#) and the [Editorial Policy Checklist](#).

### Statistics

For all statistical analyses, confirm that the following items are present in the figure legend, table legend, main text, or Methods section.

n/a Confirmed

- The exact sample size ( $n$ ) for each experimental group/condition, given as a discrete number and unit of measurement
- A statement on whether measurements were taken from distinct samples or whether the same sample was measured repeatedly
- The statistical test(s) used AND whether they are one- or two-sided  
*Only common tests should be described solely by name; describe more complex techniques in the Methods section.*
- A description of all covariates tested
- A description of any assumptions or corrections, such as tests of normality and adjustment for multiple comparisons
- A full description of the statistical parameters including central tendency (e.g. means) or other basic estimates (e.g. regression coefficient) AND variation (e.g. standard deviation) or associated estimates of uncertainty (e.g. confidence intervals)
- For null hypothesis testing, the test statistic (e.g.  $F$ ,  $t$ ,  $r$ ) with confidence intervals, effect sizes, degrees of freedom and  $P$  value noted  
*Give  $P$  values as exact values whenever suitable.*
- For Bayesian analysis, information on the choice of priors and Markov chain Monte Carlo settings
- For hierarchical and complex designs, identification of the appropriate level for tests and full reporting of outcomes
- Estimates of effect sizes (e.g. Cohen's  $d$ , Pearson's  $r$ ), indicating how they were calculated

*Our web collection on [statistics for biologists](#) contains articles on many of the points above.*

### Software and code

Policy information about [availability of computer code](#)

Data collection

Accuri C6 flow cytometer and FACSDiva software (BD Biosciences) was used to collect flow cytometry data. QuantStudio 7 Flex Real Time PCR System (Applied Biosystems) was used to collect qPCR data. Exploris 480 Orbitrap mass spectrometer (Thermo Fisher Scientific) coupled with an UltiMate 3000 UPLC system (Thermo Fisher Scientific) were used for LC-MS/MS analyses. TCS SPE (Leica) confocal microscope was used to collect multiple immunofluorescence images. FACSARIAIII cell sorter (BD Biosciences) was using for sorting of CD45+ cells for scRNA sequencing. Libraries were prepared and sequenced on a NovaSeq platform (Illumina).

Data analysis

FlowJo (Version 10) was used for analysis of flow cytometry data. QuantStudio Real-Time PCR System software (version 1.3) was used for analysis of qPCR data. GraphPad Prism (Version 6) was used for analysis of data and carry out statistical analysis. Tumor-initiating cell frequency was calculated using Extreme Limiting Dilution Analysis (ELDA) software. Protein-protein interaction analysis from proteomics data was performed using STRING platform (version 11.0b). The TMT data from phosphoproteome analysis were searched against the Homo sapiens UniProt database (version June 2020, 20368 entries) using the SEQUEST algorithm (Proteome Discoverer 2.4, Thermo Fisher Scientific). The acquired label-free DDA data were searched against the Homo sapiens UniProt database (version June 2020) using the SEQUEST algorithm (Proteome Discoverer 2.4, Thermo Fisher Scientific). GSEA (version 4.0.3) with hallmark gene sets database was used for GSEA experiments. ImageJ (version 1.51k) was used to analyze immunohistochemistry and multiple immunofluorescence images. Cell Ranger Single Cell software (version 5.0.1), Seurat R package (version 4.1.1), SingleR package (version 2.0.0) and TILPRED (version 1.0)

were used for analysis of scRNA sequencing data.

For manuscripts utilizing custom algorithms or software that are central to the research but not yet described in published literature, software must be made available to editors and reviewers. We strongly encourage code deposition in a community repository (e.g. GitHub). See the Nature Portfolio [guidelines for submitting code & software](#) for further information.

## Data

Policy information about [availability of data](#)

All manuscripts must include a [data availability statement](#). This statement should provide the following information, where applicable:

- Accession codes, unique identifiers, or web links for publicly available datasets
- A description of any restrictions on data availability
- For clinical datasets or third party data, please ensure that the statement adheres to our [policy](#)

The mass spectrometry proteomics data have been deposited to the ProteomeXchange Consortium via the PRIDE partner repository with the dataset identifier PXD038152. scRNA sequencing data is available at GSE218010. Transcriptome profiling data of human normal and cirrhotic livers, early to advanced stage of HCC dataset (GSE25097) was directly access through GEO website (NCBI).

## Human research participants

Policy information about [studies involving human research participants and Sex and Gender in Research.](#)

### Reporting on sex and gender

1. Levatinib-sensitive and lenvatinib-resistant HCC tumor samples  
All subjects' sex were consistent with their gender. Participants were Chinese male, aged from 43-57.
2. Tissue microarray of HCC samples  
All subjects' sex were consistent with their gender. All participants were Chinese. Among the 51 samples collected, 47 participants were male while 4 were female. Median age of the participants was 52.

### Population characteristics

1. Levatinib-sensitive and lenvatinib-resistant HCC tumor samples  
Participants were Chinese male, aged from 43-57.
- 2.2. Tissue microarray of HCC samples  
Participants were Chinese of median age was 52.

### Recruitment

1. Levatinib-sensitive and lenvatinib-resistant HCC tumor samples  
Primary HCC patients were recruited by Tongji Hospital, Tongji Medical College, Huazhong University of Science and Technology. There is no potential bias for recruiting patient cohort. Seven archived paraffin-embedded pathological specimens from primary HCC patients were collected along with complete clinical and pathological data at the Tongji Hospital, Tongji Medical College, Huazhong University of Science and Technology, Wuhan, China. All samples were anonymous.
2. Tissue microarray of HCC samples  
Primary HCC patients were recruited by Sun Yat-sen University Cancer Center in Guangzhou, China. There is no potential bias for recruiting patient cohort. 51 archived paraffin-embedded pathological specimens from primary HCC patients were collected along with complete clinical and pathological data at the Sun Yat-sen University Cancer Center. All samples were anonymous.

### Ethics oversight

1. Levatinib-sensitive and lenvatinib-resistant HCC tumor samples  
This study was approved by the Institutional Review Board for ethical review from Huazhong University of Science and Technology, Wuhan, China (2019s1096). The procurement of all clinical information has received consent from patients.
2. Tissue microarray of HCC samples  
Institutional Review Board and Human Ethics Committee of Sun Yat-sen University Cancer Center approved collection and usage of tissue microarray. All patients participated with informed consent. This study was approved by the Institute Research Medical Ethics Committee (G-2022-105-01).

Note that full information on the approval of the study protocol must also be provided in the manuscript.

## Field-specific reporting

Please select the one below that is the best fit for your research. If you are not sure, read the appropriate sections before making your selection.

- Life sciences       Behavioural & social sciences       Ecological, evolutionary & environmental sciences

For a reference copy of the document with all sections, see [nature.com/documents/nr-reporting-summary-flat.pdf](https://www.nature.com/documents/nr-reporting-summary-flat.pdf)

# Life sciences study design

All studies must disclose on these points even when the disclosure is negative.

|                 |                                                                                                                                                                                                                                                                                                                                                                                                                                                                                                                                                                                                                                                                                                                                                                                             |
|-----------------|---------------------------------------------------------------------------------------------------------------------------------------------------------------------------------------------------------------------------------------------------------------------------------------------------------------------------------------------------------------------------------------------------------------------------------------------------------------------------------------------------------------------------------------------------------------------------------------------------------------------------------------------------------------------------------------------------------------------------------------------------------------------------------------------|
| Sample size     | We did not perform sample size calculations and sample sizes were chosen according to accepted standards in the field of study (Naegle K, Gough NR, Yaffe MB. Criteria for biological reproducibility: what does "n" mean? Sci Signal. 2015 Apr 7;8(371):fs7. doi: 10.1126/scisignal.aab1125.). Individual data points from biological replicates were shown in each figure. For animal studies, preliminary experiments were performed to determine the variation in xenograft (subcutaneous inoculation) or liver tumor (hydrodynamic tail vein injection) growth rate and response to treatment. The scRNA sequencing was performed from lenvatinib resistant mouse treated either with lenvatinib or combined lenvatinib and palbociclib, with one mouse included for each set of data. |
| Data exclusions | No data was excluded from this study.                                                                                                                                                                                                                                                                                                                                                                                                                                                                                                                                                                                                                                                                                                                                                       |
| Replication     | All experiments were repeated three times or more, with the exception of the following:<br>1. XO44 kinase pull down mass spectrometry analysis (n=1)<br>2. parallel reaction monitoring (PRM) (n=2)<br>The number of biological replicates and independent experiments are stated in the figure legend. All attempts at the replication were successful.                                                                                                                                                                                                                                                                                                                                                                                                                                    |
| Randomization   | All mice were randomly assigned to treatment groups to ensure similar initial size of xenografts (subcutaneous inoculation) or similar initial bioluminescent signal intensity of liver tumors (hydrodynamic tail vein injection) before administration of treatment between groups.                                                                                                                                                                                                                                                                                                                                                                                                                                                                                                        |
| Blinding        | All authors were not blinded to group allocation, data collection or data analysis because the investigators were responsible for performing the experiment, collecting and labelling the samples, and analysis of data. For analysis of sequencing data, blinding was not necessary. We have planned the analysis pipeline before the acquisition of sequencing data.                                                                                                                                                                                                                                                                                                                                                                                                                      |

## Reporting for specific materials, systems and methods

We require information from authors about some types of materials, experimental systems and methods used in many studies. Here, indicate whether each material, system or method listed is relevant to your study. If you are not sure if a list item applies to your research, read the appropriate section before selecting a response.

### Materials & experimental systems

| n/a                                 | Included in the study                                           |
|-------------------------------------|-----------------------------------------------------------------|
| <input type="checkbox"/>            | <input checked="" type="checkbox"/> Antibodies                  |
| <input type="checkbox"/>            | <input checked="" type="checkbox"/> Eukaryotic cell lines       |
| <input checked="" type="checkbox"/> | <input type="checkbox"/> Palaeontology and archaeology          |
| <input type="checkbox"/>            | <input checked="" type="checkbox"/> Animals and other organisms |
| <input type="checkbox"/>            | <input checked="" type="checkbox"/> Clinical data               |
| <input checked="" type="checkbox"/> | <input type="checkbox"/> Dual use research of concern           |

### Methods

| n/a                                 | Included in the study                              |
|-------------------------------------|----------------------------------------------------|
| <input checked="" type="checkbox"/> | <input type="checkbox"/> ChIP-seq                  |
| <input type="checkbox"/>            | <input checked="" type="checkbox"/> Flow cytometry |
| <input checked="" type="checkbox"/> | <input type="checkbox"/> MRI-based neuroimaging    |

## Antibodies

| Antibodies used |                                                                         |
|-----------------|-------------------------------------------------------------------------|
|                 | $\beta$ -actin (AC-74) (#A5316, Sigma Aldrich)                          |
|                 | $\beta$ -catenin (D10A8) (#8480S, Cell Signaling Technology)            |
|                 | CD4 (D7D2Z) (#25229S, Cell Signaling Technology)                        |
|                 | CD8 $\alpha$ (D4W2Z) (#98941S, Cell Signaling Technology)               |
|                 | CDK4 (D9G3E) (#12790, Cell Signaling Technology)                        |
|                 | CDK4 [EPR2513Y] (ab68266, Abcam)                                        |
|                 | CDK6 (D4S8S) (#13331, Cell Signaling Technology)                        |
|                 | CDK6 [EPR4515] (ab124821, Abcam)                                        |
|                 | CDK6 (ab151247, Abcam)                                                  |
|                 | FOXP3 (5H10L18) (#700914, Thermo Scientific)                            |
|                 | GSK3 $\beta$ (H-76) (sc9166, Santa Cruz)                                |
|                 | GSK3 $\beta$ (clone 7) (#610202, clone 7, BD Transduction Laboratories) |
|                 | p-GSK3 $\beta$ (Ser9) (D3A4) (#9322S, Cell Signaling Technology)        |
|                 | HA (1F5C6) (#66061-1-Ig-AP, clone 1C1D2, Proteintech)                   |
|                 | MAP3K7 [EPR5984] (ab109526, Abcam)                                      |
|                 | p44/42 MAPK (#9102S, Cell Signaling Technology)                         |
|                 | p-p44/42 MAPK (#9101S, Cell Signaling Technology)                       |
|                 | OCT4 (C-10) (sc5279, Clone C-10, Santa Cruz)                            |
|                 | PCNA [PC10] (ab29, Abcam)                                               |
|                 | PD-1 (D7D5W) (#84651S, Cell Signaling Technology)                       |

## Validation

RPS6KA4 (D41A4) (#3679, Cell Signaling Technology)  
 SOX2 (D6D9) (#3579, Cell Signaling Technology)  
 YAP (D8H1X) (#14074S Cell Signaling Technology)  
 p-YAP(Ser127) (D9W2I) (#13008, Cell Signaling Technology)

All antibodies are validated by the manufacturer as suitable for the applications. The product size in Western Blot experiments were confirmed by comparison to protein size ladder.

$\beta$ -actin (AC-74) (#A5316, Sigma Aldrich): <https://www.sigmaaldrich.com/HK/en/product/sigma/a5316>

$\beta$ -catenin (D10A8) (#8480S, Cell Signaling Technology): <https://www.cellsignal.com/products/primary-antibodies/b-catenin-d10a8-xp-rabbit-mab/8480>

CD4 (D7D2Z) (#25229S, Cell Signaling Technology): <https://www.cellsignal.com/products/primary-antibodies/cd4-d7d2z-rabbit-mab/25229>

CD8 $\alpha$  (D4W2Z) (#98941S, Cell Signaling Technology): <https://www.cellsignal.com/products/primary-antibodies/cd8a-d4w2z-xp-rabbit-mab/98941>

CDK4 (D9G3E) (#12790, Cell Signaling Technology): <https://www.cellsignal.com/products/primary-antibodies/cdk4-d9g3e-rabbit-mab/12790>

CDK4 [EPR2513Y] (ab68266, Abcam): <https://www.abcam.com/products/primary-antibodies/cdk4-antibody-epr2513y-ab68266.html>

CDK6 (D4S8S) (#13331, Cell Signaling Technology): <https://www.cellsignal.com/products/primary-antibodies/cdk6-d4s8s-rabbit-mab/13331>

CDK6 [EPR4515] (ab124821, Abcam): <https://www.abcam.com/products/primary-antibodies/cdk6-antibody-epr4515-ab124821.html>

CDK6 (ab151247, Abcam): <https://www.abcam.com/products/primary-antibodies/cdk6-antibody-ab151247.html>

FOXP3 (5H10L18) (#700914, Thermo Scientific): <https://www.thermofisher.com/antibody/product/FOXP3-Antibody-clone-5H10L18-Recombinant-Monoclonal/700914>

GSK3 $\beta$  (H-76) (sc9166, Santa Cruz): <https://datasheets.scbt.com/sc-9166.pdf>

GSK3 $\beta$  (clone 7) (#610202, clone 7, BD Transduction Laboratories): <https://wwwbdbiosciences.com/en-nz/products/reagents/microscopy-imaging-reagents/immunofluorescence-reagents/purified-mouse-anti-gsk-3.610202>

p-GSK3 $\beta$  (Ser9) (D3A4) (#9322S, Cell Signaling Technology): [https://www.cellsignal.com/products/primary-antibodies/phospho-gsk-3-beta-ser9-d3a4-rabbit-mab/9322?\\_requestid=4256347](https://www.cellsignal.com/products/primary-antibodies/phospho-gsk-3-beta-ser9-d3a4-rabbit-mab/9322?_requestid=4256347)

HA (1F5C6) (#66061-1-Ig-AP, clone 1C1D2, Proteintech): <https://www.ptglab.com/products/HA-Tag-Antibody-66006-1-Ig.htm>

MAP3K7 [EPR5984] (ab109526, Abcam): <https://www.abcam.com/products/primary-antibodies/tak1-antibody-epr5984-ab109526.html>

p44/42 MAPK (#9102S, Cell Signaling Technology): <https://www.cellsignal.com/products/primary-antibodies/p44-42-mapk-erk1-2-antibody/9102>

p-p44/42 MAPK (#9101S, Cell Signaling Technology): <https://www.cellsignal.com/products/primary-antibodies/phospho-p44-42-mapk-erk1-2-thr202-tyr204-antibody/9101>

OCT4 (C-10) (sc5279, Clone C-10, Santa Cruz): <https://www.scbt.com/p/oct-3-4-antibody-c-10>

PCNA [PC10] (ab29, Abcam): <https://www.abcam.com/products/primary-antibodies/pcna-antibody-pc10-ab29.html>

PD-1 (D7D5W) (#84651S, Cell Signaling Technology): <https://www.cellsignal.com/products/primary-antibodies/pd-1-intracellular-domain-d7d5w-xp-rabbit-mab/84651>

RPS6KA4 (D41A4) (#3679, Cell Signaling Technology): <https://www.cellsignal.com/products/primary-antibodies/msk2-d41a4-xp-rabbit-mab/3679>

SOX2 (D6D9) (#3579, Cell Signaling Technology): <https://www.cellsignal.com/product/productDetail.jsp?productId=3579>

YAP (D8H1X) (#14074S Cell Signaling Technology): <https://www.cellsignal.com/product/productDetail.jsp?productId=14074>

p-YAP(Ser127) (D9W2I) (#13008, Cell Signaling Technology): <https://www.cellsignal.com/products/primary-antibodies/phospho-yap-ser127-d9w2i-rabbit-mab/13008>

## Eukaryotic cell lines

Policy information about [cell lines and Sex and Gender in Research](#)

|                                                                   |                                                                                                                                                                                                                                                                                                                                  |
|-------------------------------------------------------------------|----------------------------------------------------------------------------------------------------------------------------------------------------------------------------------------------------------------------------------------------------------------------------------------------------------------------------------|
| Cell line source(s)                                               | MHCC-97L and MHCC-97H human HCC cell lines (Liver Cancer Institute, Fudan University); Hep3B, HepG2 and SNU-182 human HCC cell lines (America Type Culture Collection, Manassas, VA, USA); Huh7 and PLC/PRF/5 human HCC cell lines (Japan Cancer Research Bank); and 293FT (Invitrogen, Thermo Fisher Scientific, Waltham, USA). |
| Authentication                                                    | All cell lines used in this study were obtained between 2013 and 2016, and they were authenticated by morphological observation and STR DNA analysis with PowerPlex® 16HS kit (Promega) as well as tested for the absence of mycoplasma contamination (MycoAlert, Lonza)                                                         |
| Mycoplasma contamination                                          | All cell lines were negatively for mycoplasma contamination and routinely tested for microplasma using PCR assay.                                                                                                                                                                                                                |
| Commonly misidentified lines (See <a href="#">ICLAC</a> register) | No commonly misidentified cell lines were used.                                                                                                                                                                                                                                                                                  |

## Animals and other research organisms

Policy information about [studies involving animals; ARRIVE guidelines](#) recommended for reporting animal research, and [Sex and Gender in Research](#)

|                         |                                                                                                                                                                                                                                                                                           |
|-------------------------|-------------------------------------------------------------------------------------------------------------------------------------------------------------------------------------------------------------------------------------------------------------------------------------------|
| Laboratory animals      | Mouse (Mus musculus), BALB/cAnN-nu (Nude), 4 to 6 weeks<br>Mouse (Mus musculus), NOD/SCID, 4 to 6 weeks<br>Mouse (Mus musculus), wild-type C57BL/6J mice, 6 to 8 weeks                                                                                                                    |
| Wild animals            | No wild animals were used in the study.                                                                                                                                                                                                                                                   |
| Reporting on sex        | Male Mouse (Mus musculus), BALB/cAnN-nu (Nude), 4 to 6 weeks<br>Male Mouse (Mus musculus), NOD/SCID, 4 to 6 weeks<br>Male Mouse (Mus musculus), wild-type C57BL/6J mice, 6 to 8 weeks                                                                                                     |
| Field-collected samples | No field collected samples were used in the study.                                                                                                                                                                                                                                        |
| Ethics oversight        | License to conduct experiments on animals was obtained from Department of Health, Hong Kong SAR.<br>The study protocol was approved by and performed in accordance with the Animal Subjects Ethics Sub-Committee (ASESC) at the Hong Kong Polytechnic University (Hong Kong, P.R. China). |

Note that full information on the approval of the study protocol must also be provided in the manuscript.

## Clinical data

Policy information about [clinical studies](#)

All manuscripts should comply with the ICMJE [guidelines for publication of clinical research](#) and a completed [CONSORT checklist](#) must be included with all submissions.

|                             |                                                                                                                          |
|-----------------------------|--------------------------------------------------------------------------------------------------------------------------|
| Clinical trial registration | <i>Provide the trial registration number from ClinicalTrials.gov or an equivalent agency.</i>                            |
| Study protocol              | <i>Note where the full trial protocol can be accessed OR if not available, explain why.</i>                              |
| Data collection             | <i>Describe the settings and locales of data collection, noting the time periods of recruitment and data collection.</i> |
| Outcomes                    | <i>Describe how you pre-defined primary and secondary outcome measures and how you assessed these measures.</i>          |

## Flow Cytometry

### Plots

Confirm that:

- The axis labels state the marker and fluorochrome used (e.g. CD4-FITC).
- The axis scales are clearly visible. Include numbers along axes only for bottom left plot of group (a 'group' is an analysis of identical markers).
- All plots are contour plots with outliers or pseudocolor plots.
- A numerical value for number of cells or percentage (with statistics) is provided.

## Methodology

Sample preparation

HCC cells were stained with specific antibody in FACS buffers.

Instrument

BD Accuri C6 flow cytometer, FACSDiva software (BD Biosciences)

Software

FlowJo (Version 10)

Cell population abundance

The final target population consists of at least 10,000 cells

Gating strategy

The total population was visualized using FSC/SSC graph, and the main population was gated. Subsequently, singlets were gated using FSH-H/FSC-A graph. The singlets were then used for analysis.

Tick this box to confirm that a figure exemplifying the gating strategy is provided in the Supplementary Information.
